# Supplementary material for: Long-term Multimodal Recording Reveals Epigenetic Adaptation Routes in Dormant Breast Cancer Cells
Source: PubMed Central journal article supplement (PMC11061610; doi:10.1158/2159-8290.cd-23-1161), 2024-03-26
Supplement: cd-23-1161_supplementary_figure_s1_suppsf1.pdf [file cd-23-1161_supplementary_figure_s1_suppsf1.pdf]

# Supplementary Figure S1. Genomic profiling and clinical history of late relapse patients

## a *Bona fide* Breast cancer drivers

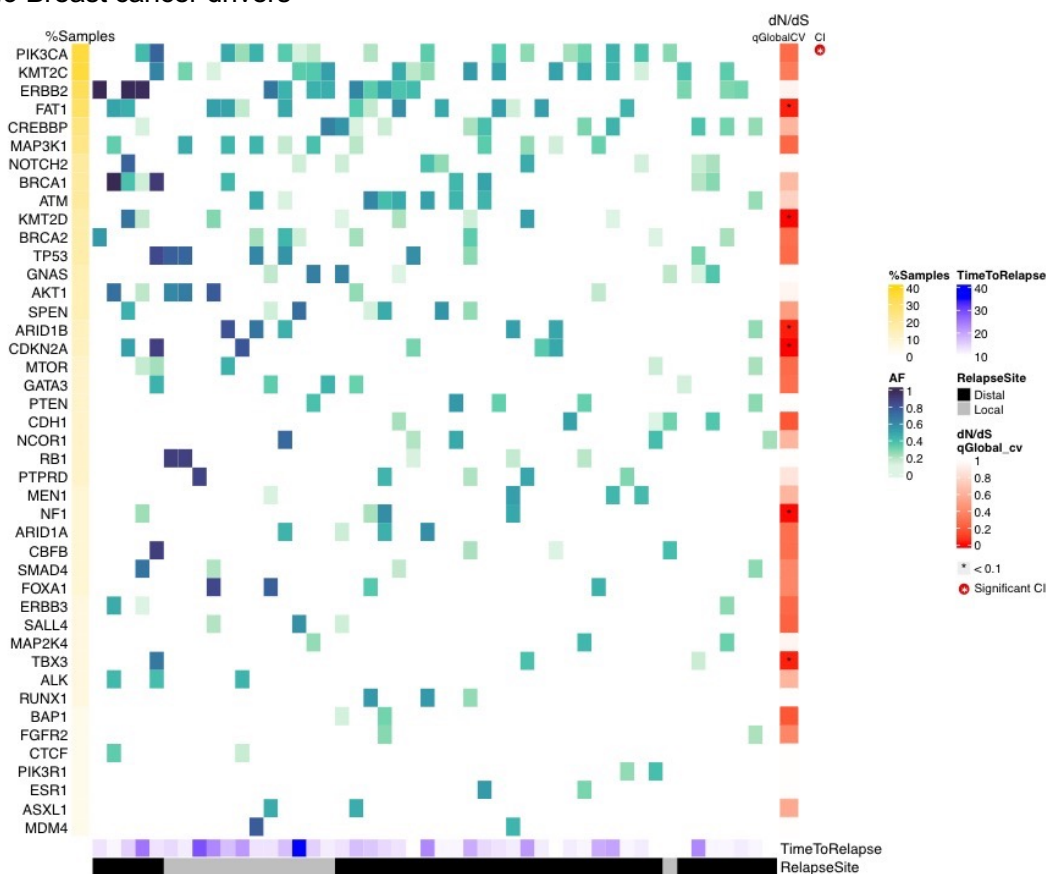

## b Late relapses – Clinical details

| Patient # | Time to Relapse (y) | Site of relapse                 | Cellularity (%) |
|-----------|---------------------|---------------------------------|-----------------|
| 1         | 11                  | Pleura                          | 70              |
| 2         | 15                  | Liver                           | 30              |
| 3         | 12                  | lymph nodes - supraclavicular   | 90              |
| 4         | 11                  | lymph node - axillary           | 70              |
| 5         | 13                  | Bone - L5                       | 70              |
| 6         | 14                  | Breast                          | 40              |
| 7         | 11                  | Lymph node - axillary           | 60              |
| 8         | 10                  | Soft tissue/Skin - Axillary     | 40              |
| 9         | 10                  | Skin- Breast (local recurrence) | 10              |
| 10        | 12                  | Soft tissue- subclavicular      | 70              |
| 11        | 11                  | Bone - iliac                    | 80              |
| 12        | 15                  | Bone - iliac                    | 50              |
| 13        | 11                  | Soft tissue- subclavicular      | 70              |
| 14        | 13                  | Liver                           | 80              |
| 15        | 10                  | Soft tissue - Parasternale      | 70              |
| 16        | 12                  | Pleura                          | 50              |
| 17        | 11                  | Soft tissue- presacrale         | 60              |
| 18        | 19                  | lymph node - axillary           | 60              |
| 19        | 10                  | Lung                            | 40              |
| 20        | 11                  | Soft tissue - subclavicular     | 60              |
| 21        | 11                  | Pleura                          | 70              |
| 22        | 17                  | Breast - local                  | 50              |
| 23        | 10                  | Skin- abdomen                   | 70              |
| 24        | 12                  | Breast                          | 60              |
| 25        | 13                  | lymph node - axillary           | 60              |
| 26        | 14                  | Lymph node - Axillary           | 60              |
| 27        | 17                  | Liver                           | 60              |
| 28        | 15                  | Breast - Local                  | 10              |
| 29        | 19                  | Pleura                          | 30              |
| 30        | 35                  | Breast - local                  | 60              |
| 31        | 29                  | Breast                          | 70              |
| 32        | 25                  | Bone - iliac                    | 60              |
| 33        | 14                  | Lung                            | 30              |
| 34        | 23                  | Lymph node                      | 30              |
| 35        | 20                  | Pleura                          | 30              |
| 36        | 12                  | Skin breast                     | 80              |
| 37        | 13                  | Lung                            | 30              |
| 38        | 23                  | Breast                          | 70              |
| 39        | 17                  | Breast                          | 40              |
| 40        | 21                  | lymph node- supraclavicular     | 60              |
| 41        | 10                  | Ovary                           | 30              |
| 42        | 12                  | Lymph node- Axillary            | 60              |
| 43        | 23                  | Soft tissue - Retroclavicular   | 60              |
| 44        | 13                  | Breast                          | 30              |
| 45        | 13                  | Breast                          | 70              |
| 46        | 16                  | liver                           | 35              |
| 47        | 12                  | Breast- left                    | 60              |
| 48        | 21                  | Breast                          | 70              |
| 49        | 13                  | Bone - iliac                    | 70              |

**Supplementary Figure S1. Genomic profiling and clinical history of late relapse patients. a)** High depth profiling of ER+ BC late relapses using a custom targeted panel. The heatmap shows the mutations of *bona fide* breast cancer drivers that passed the filter for Allele depth  $\geq 20$ , Alternate F1R2+F2R1  $\geq 4$ , Allele frequency  $\geq 0.1$  and consequence level of moderate or high. Time to relapse, recurrence in the dataset, allele frequency and relapse site are indicated across x and y axes. Significant genes are indicated based on dN/dS analysis from the q-value of neutrality test at gene level (\*qglobal\_cv  $\leq 0.1$ ) and confidence intervals for the dN/dS ratios per gene (\* CI for missense and truncating mutations do not span through value of 1). **b)** Table depicting the time to relapse (in years), site of relapse and cellularity (%) of late relapse samples (n=49).
