# Supplementary material for: Long-term Multimodal Recording Reveals Epigenetic Adaptation Routes in Dormant Breast Cancer Cells
Source: PubMed Central journal article supplement (PMC11061610; doi:10.1158/2159-8290.cd-23-1161), 2024-03-26
Supplement: cd-23-1161_supplementary_figure_s5_suppsf5.pdf [file cd-23-1161_supplementary_figure_s5_suppsf5.pdf]

# Supplementary Figure S5. Spatial Transcriptomics of patients 2-3

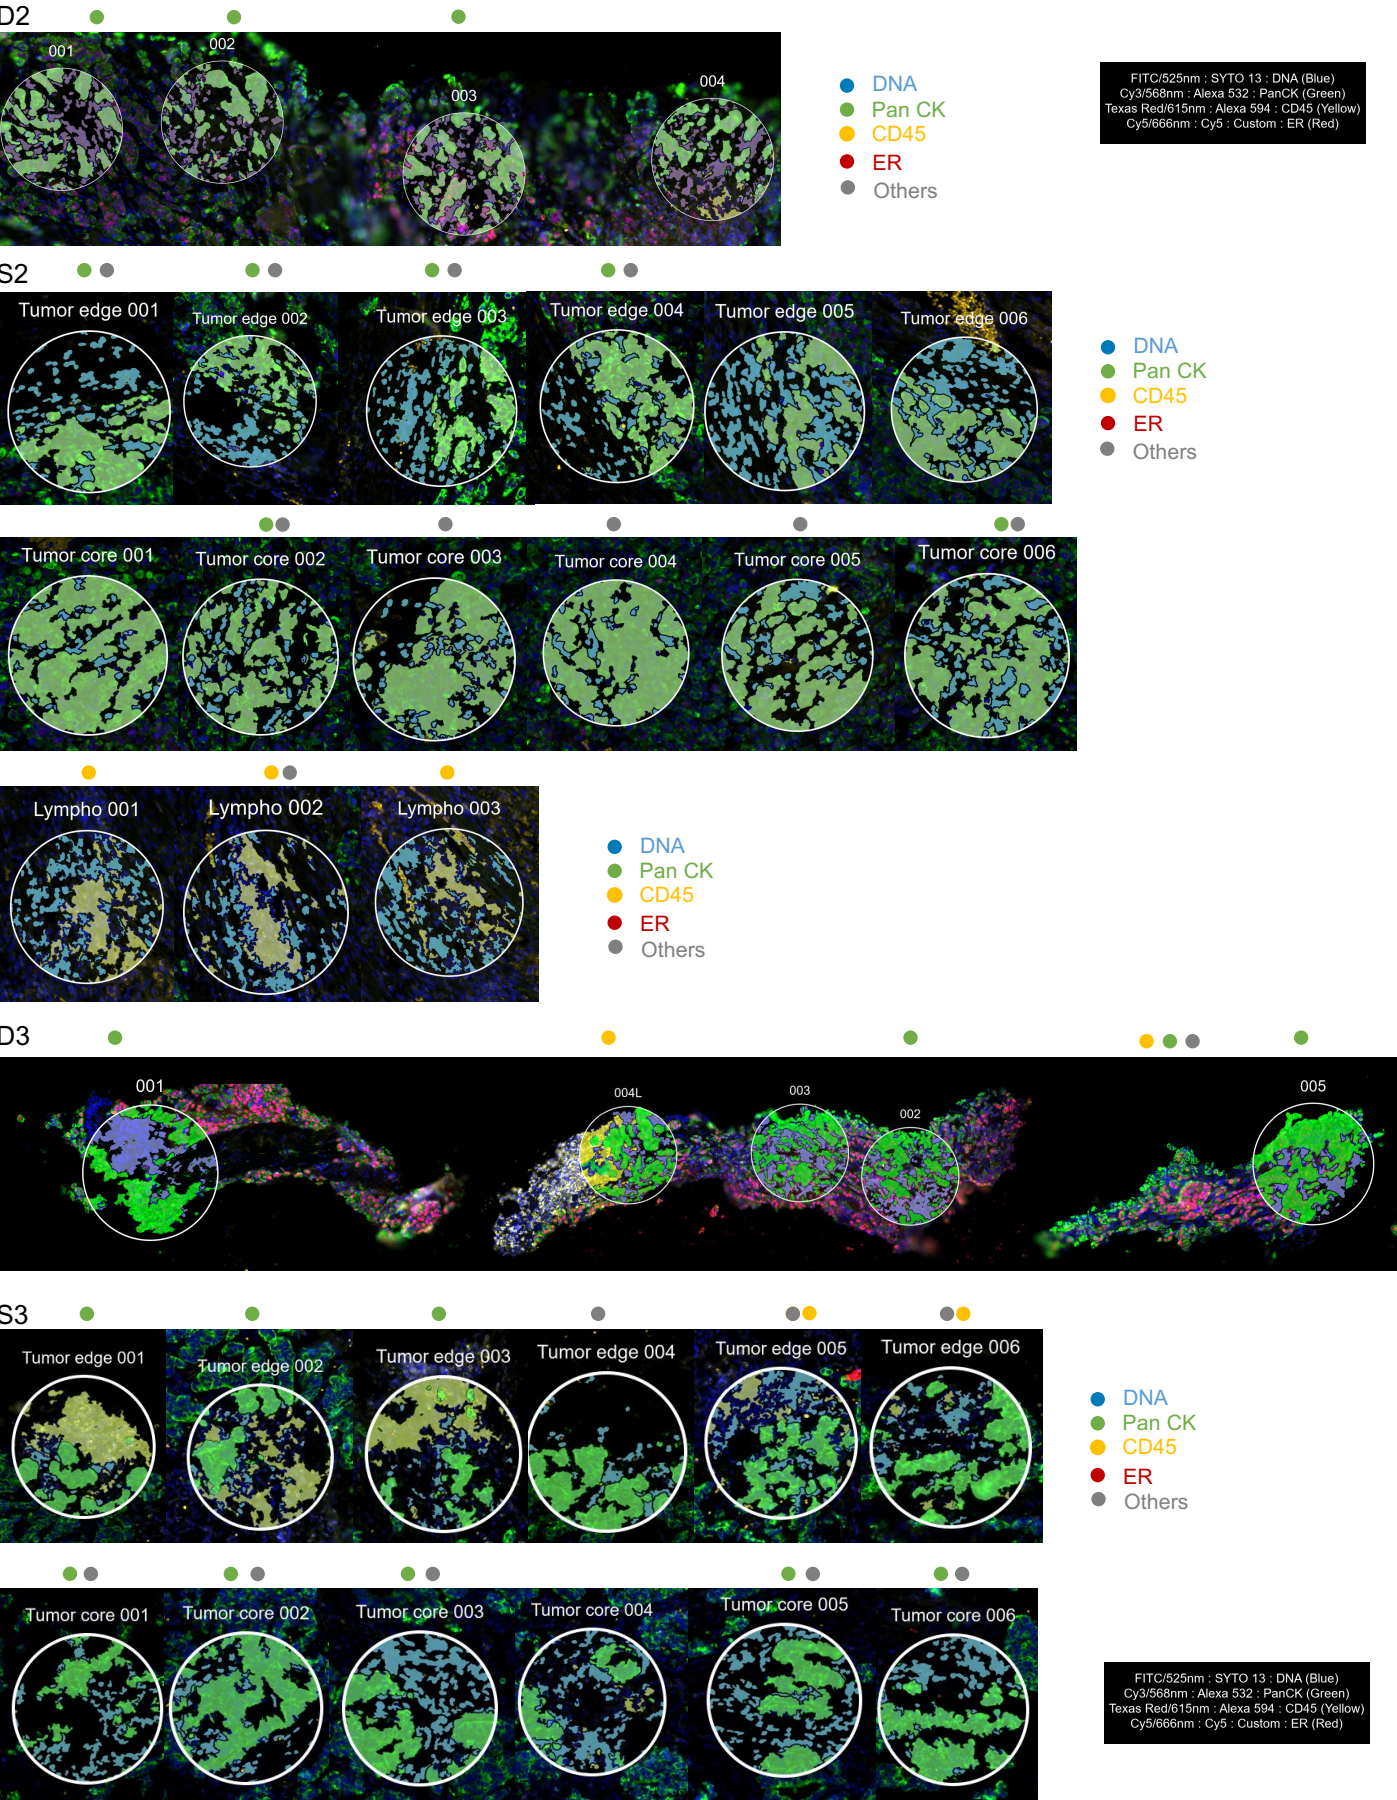

**Supplementary Figure S5. Spatial transcriptomics of patients 2-3.** Profiled region of interests (ROIs) of spatial transcriptomics (GeoMx) from patients 2 and 3 with relevant staining (DNA: blue, Pan-cytokeratin: green, CD45: yellow, ER: red). D2: diagnostic biopsy (patient 2), S2: surgery biopsy (patient 2), D3: diagnostic biopsy (patient 3), S3: surgery biopsy (patient 3), Lympho: Lymph node. The dots over each image represent the ROI from corresponding segments that passed the QC.
