# Supplementary material for: Long-term Multimodal Recording Reveals Epigenetic Adaptation Routes in Dormant Breast Cancer Cells
Source: PubMed Central journal article supplement (PMC11061610; doi:10.1158/2159-8290.cd-23-1161), 2024-03-26

# Supplementary Figure S7. Differential expression profiling of tumour biopsies from spatially resolved CK+ segments of Patients 1-3

## a Significantly differentially expressed genes

### Patient 1

Segment=CK+, Comparison=S1RvsS1L

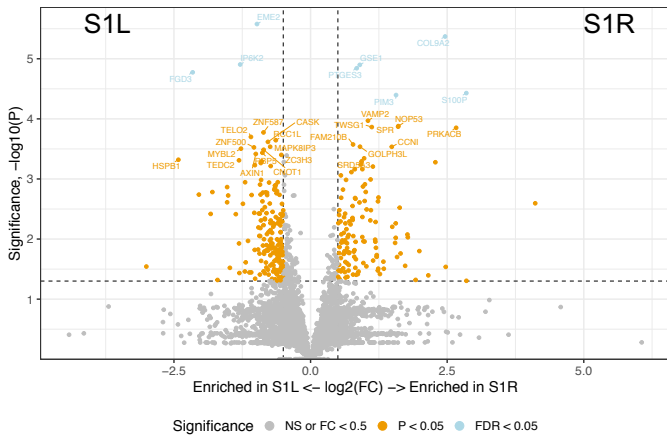

Labelled:  
abs(log2FC) > 0.5 & FDR < 0.05 or  
abs(log2FC) > 0.5 & P-value < 0.0005

Segment=CK+, Comparison=R1RvsS1R

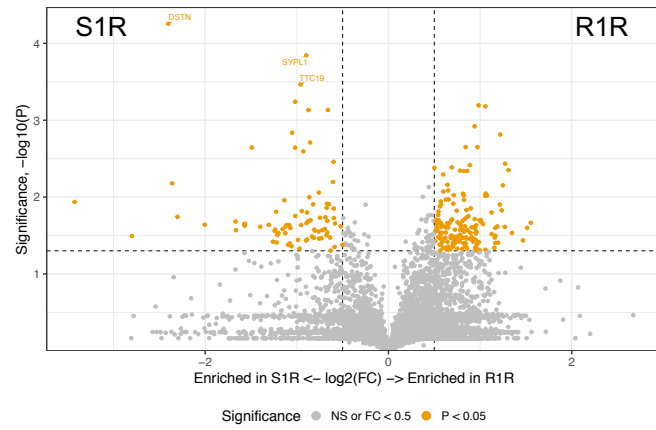

### Patient 2

Segment=CK+, Comparison=S2VsD2

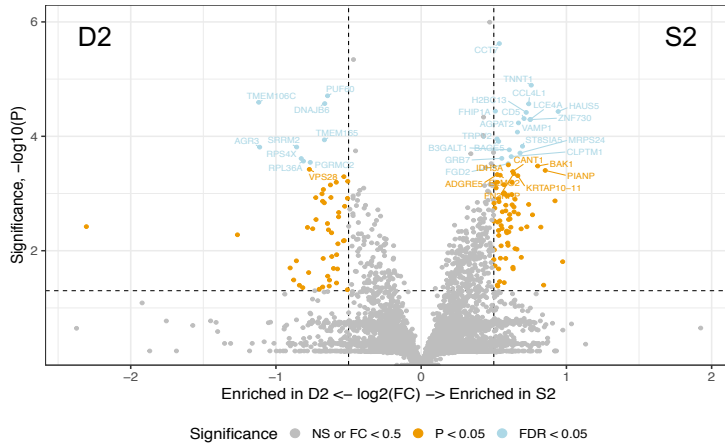

### Patient 3

Segment=CK+, Comparison=S3VsD3

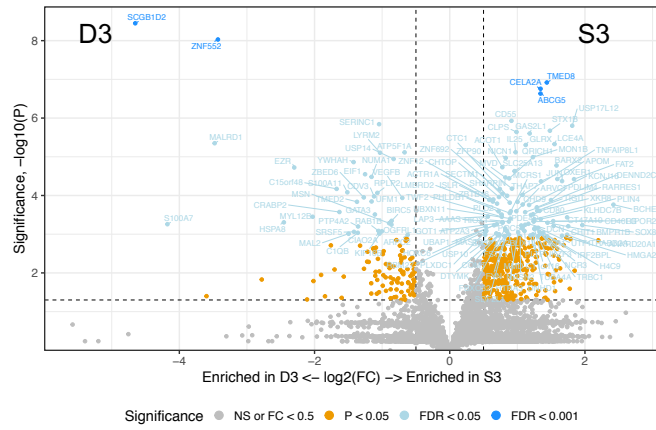

Supplement: cd-23-1161_supplementary_figure_s7_suppsf7.pdf [file cd-23-1161_supplementary_figure_s7_suppsf7.pdf]
