# Supplementary material for: Long-term Multimodal Recording Reveals Epigenetic Adaptation Routes in Dormant Breast Cancer Cells
Source: PubMed Central journal article supplement (PMC11061610; doi:10.1158/2159-8290.cd-23-1161), 2024-03-26
Supplement: cd-23-1161_supplementary_figure_s9_suppsf9.pdf [file cd-23-1161_supplementary_figure_s9_suppsf9.pdf]

# Supplementary Figure S9. Correlation between barcode compositions in Traditium samples

Correlation of BC frequencies between POTs and T<sub>0</sub>

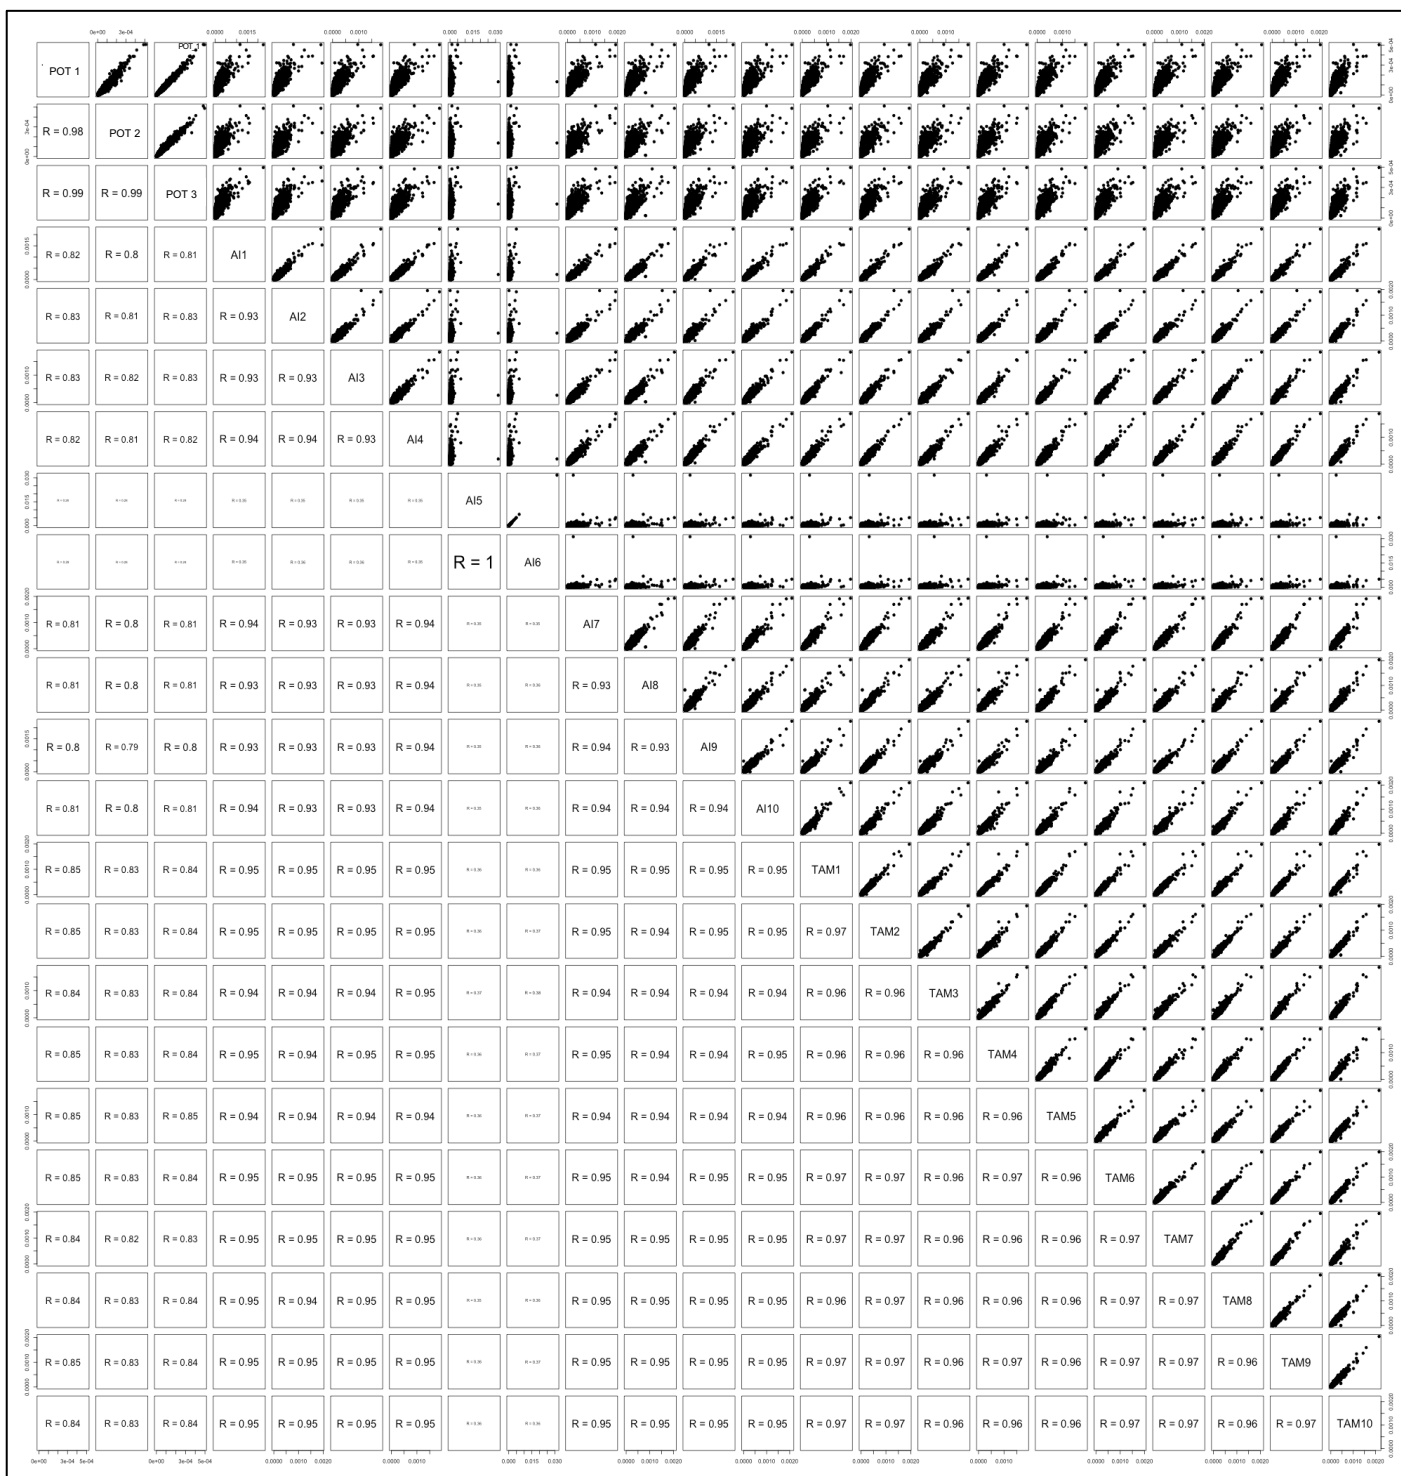

**Supplementary Figure S9. Correlation between barcode compositions in Traditium samples.** Ranked correlation between barcode composition in 3 POTs (pre-treatment) and 20 time zero (T<sub>0</sub>) replicates (upper triangle: correlation plots; diagonal: sample names; lower triangle: significance values from Spearman correlation test). AI1-10 T<sub>0</sub> reflect Hyperflask seeding in -E2 flasks. TAM 1-10 T<sub>0</sub> reflect seeding in TAM Hyperflasks (Technical problems effected the analysis of two samples -AI5 and AI6-).
