# Supplementary material for: Long-term Multimodal Recording Reveals Epigenetic Adaptation Routes in Dormant Breast Cancer Cells
Source: PubMed Central journal article supplement (PMC11061610; doi:10.1158/2159-8290.cd-23-1161), 2024-03-26
Supplement: cd-23-1161_supplementary_figure_s11_suppsf11.pdf [file cd-23-1161_supplementary_figure_s11_suppsf11.pdf]

# Supplementary Figure S11. Barcode extinction dynamics in Traditium samples

**a**

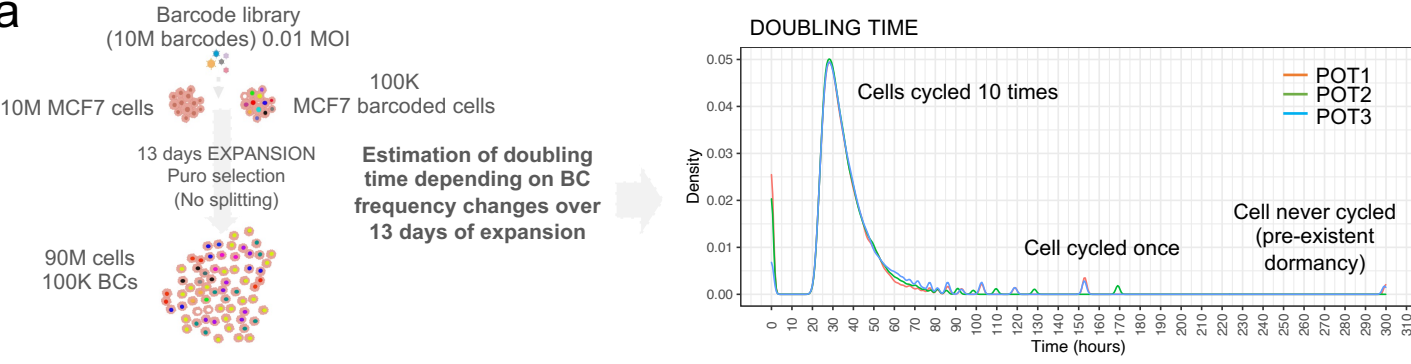

**b**

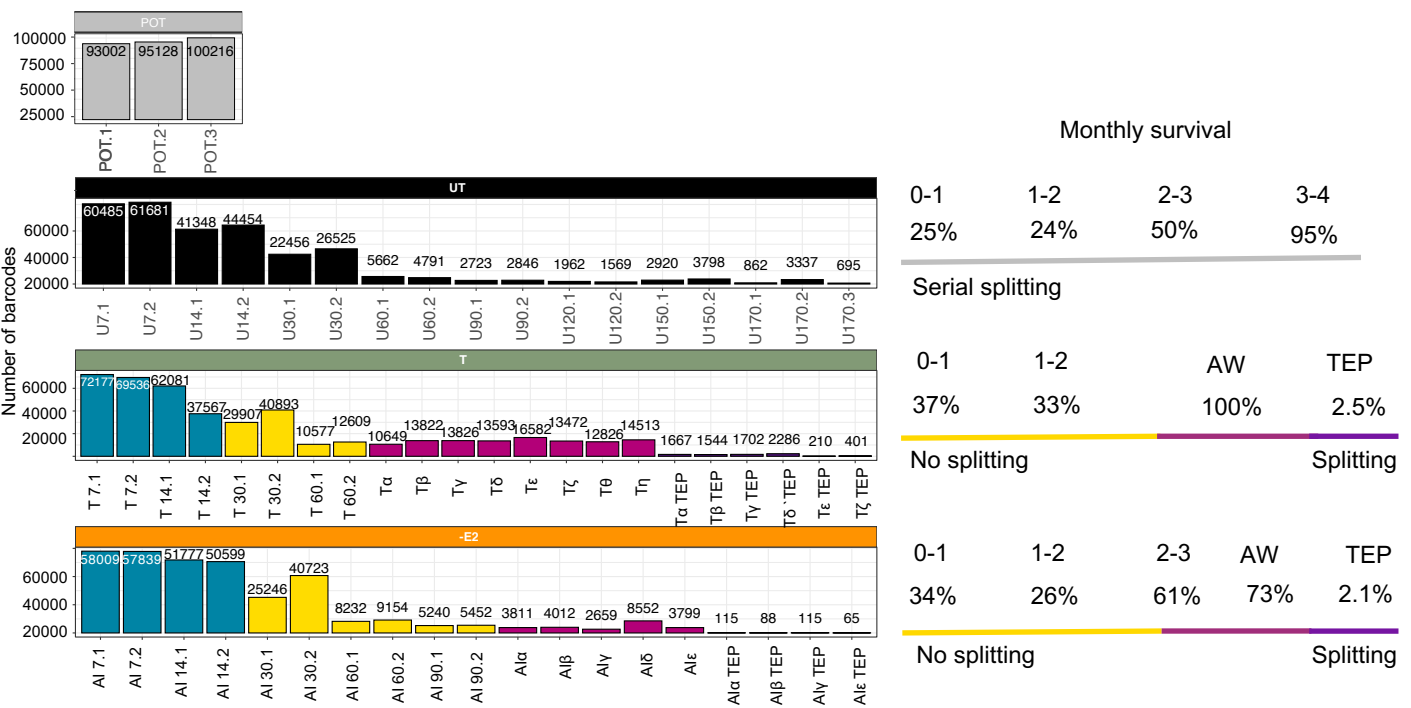

**c**

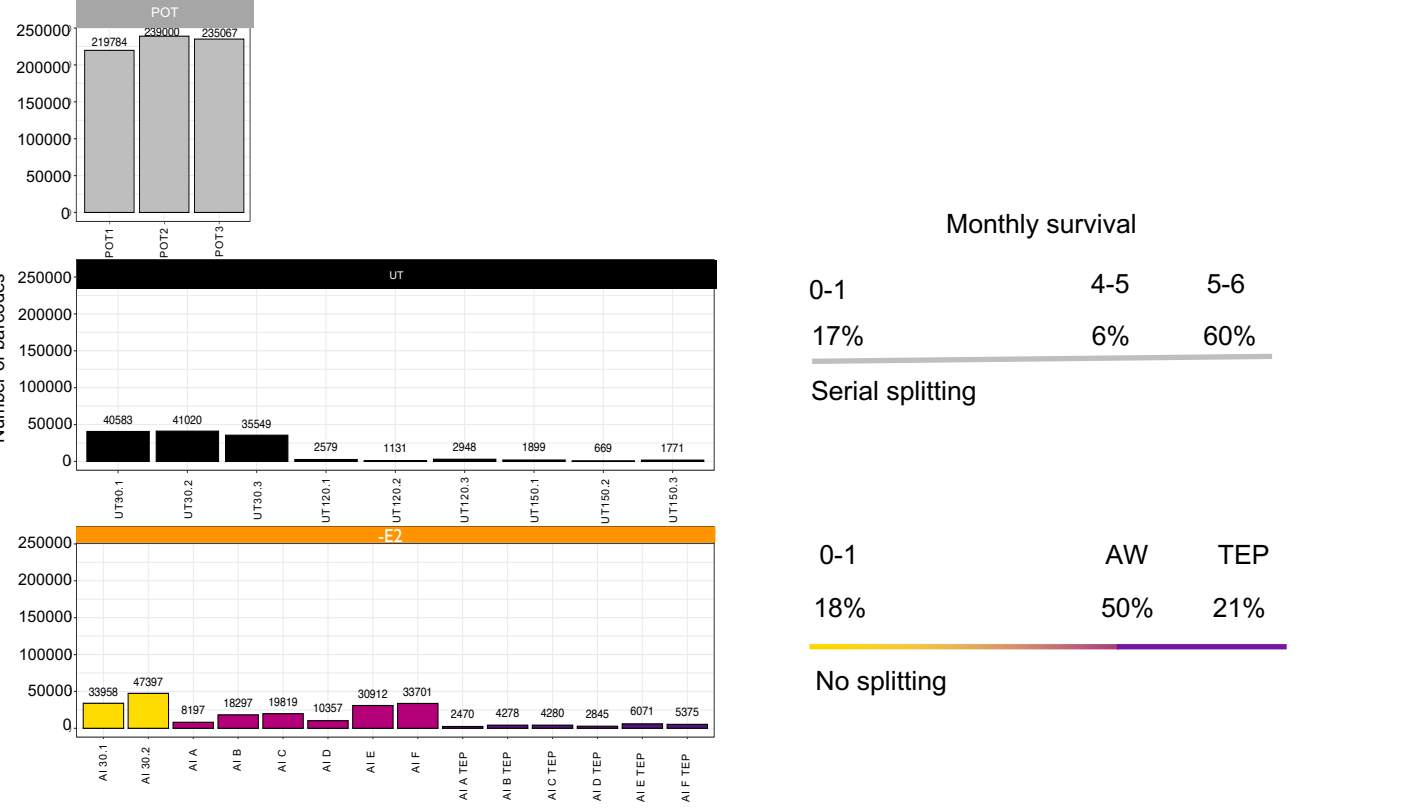

**Supplementary Figure S11. Barcode extinction dynamics in Tradition samples.** **a)** Density plot of relative barcode abundance across estimated doubling time shows overall consistency in POT (pre-treatment) replicates (with a slight lag in POT2) and indicates presence of cells cycling 10 times (doubling time ~30h), very slow cycling cells that might have undergone cell cycle only once (doubling time ~150h) and cells that might not have cycled (doubling time ~300h) during 13 days of expansion between transduction and POT. **b)** Number of initial barcodes at POT and number of surviving barcodes at each indicated time point, are listed for UT (untreated), TAM (tamoxifen) and -E2 (oestrogen deprivation (mimicking AI)) arms of MCF7 including their respective TEPs (terminal end points, late relapse). **c)** Number of initial barcodes at POT and number of surviving barcodes at each indicated time point, are listed for UT and -E2 arms of T47D including their respective TEPs. A summary of the percentages of surviving barcodes along the collection points is shown on the right side of the panel.
