# Supplementary material for: Long-term Multimodal Recording Reveals Epigenetic Adaptation Routes in Dormant Breast Cancer Cells
Source: PubMed Central journal article supplement (PMC11061610; doi:10.1158/2159-8290.cd-23-1161), 2024-03-26
Supplement: cd-23-1161_supplementary_figure_s18_suppsf18.pdf [file cd-23-1161_supplementary_figure_s18_suppsf18.pdf]

# Supplementary Figure S18. TRADITIOM LSC barcode statistics at single cell level and quality checks

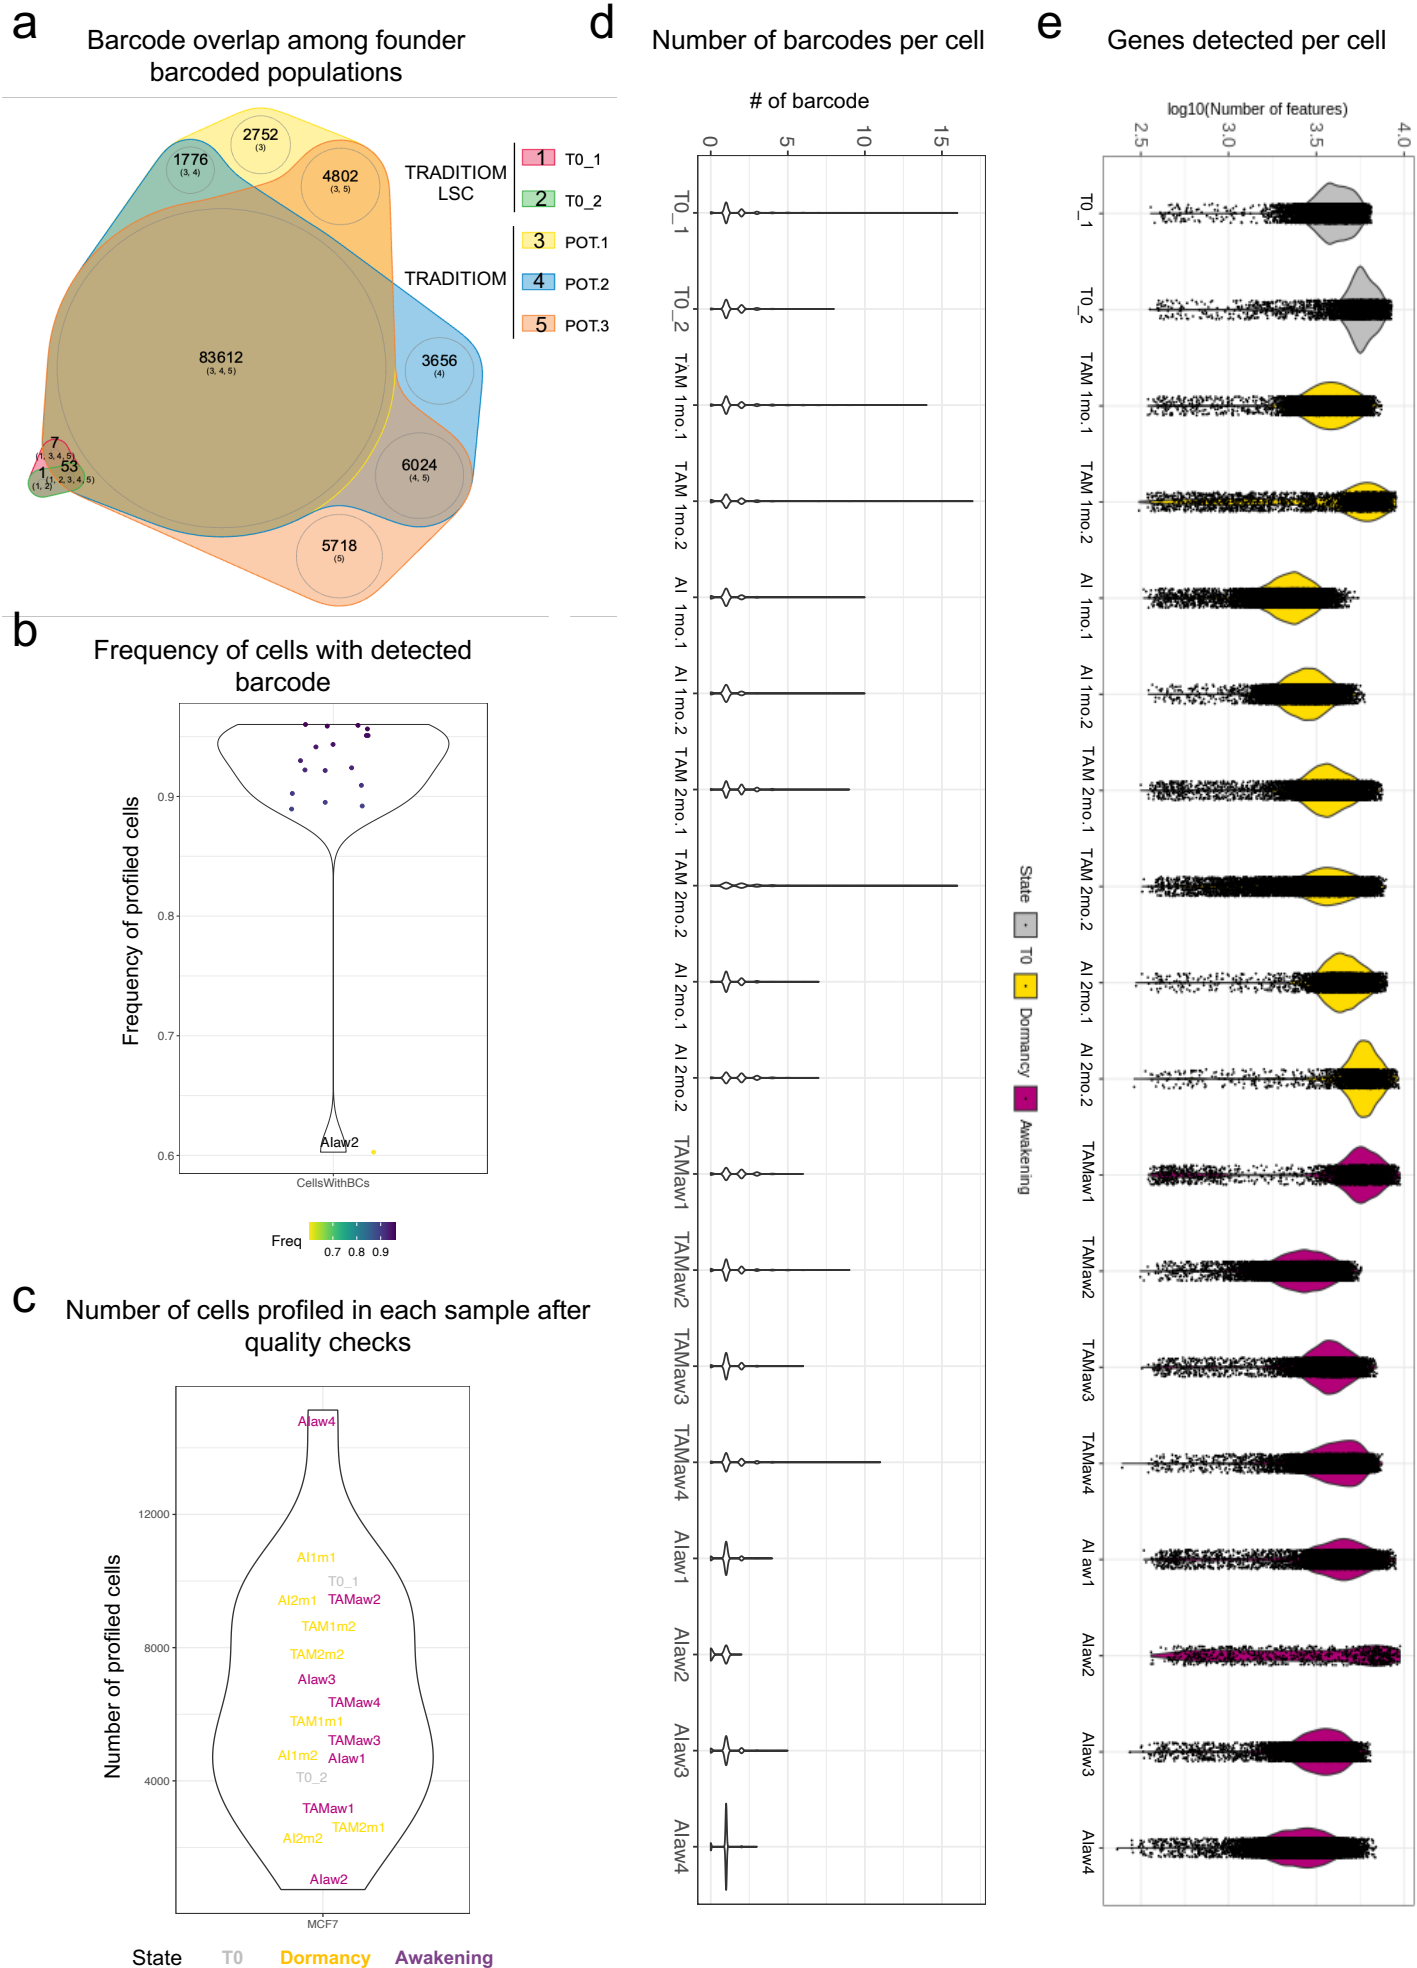

**Supplementary Figure S18. TRADITIOM LSC barcode statistics at single cell level and quality checks.** **a)** Barcode overlap between MCF7 TRADITIOM POTs (pre-treatment) (100K barcodes) and MCF7 TRADITIOM Live Single Cell (LSC) T0 (Time zero) samples (100 barcodes subsampled from TRADITIOM POT). **b)** Frequency of cells with detected barcodes. Barcodes could be detected in more than 85% of the cells for all the samples other than Alaw2 (-E2 arm, awakening sample 2). **c)** Number of cells profiled in each MCF7 TRADITIOM LSC (live single cell) sample after quality checks. **d)** Number of detected barcodes per cell along TRADITIOM LSC for MCF7 cells. **e)** Number of genes detected per cell in MCF7 TRADITIOM dataset.
