# Supplementary material for: Long-term Multimodal Recording Reveals Epigenetic Adaptation Routes in Dormant Breast Cancer Cells
Source: PubMed Central journal article supplement (PMC11061610; doi:10.1158/2159-8290.cd-23-1161), 2024-03-26
Supplement: cd-23-1161_supplementary_figure_s19_suppsf19.pdf [file cd-23-1161_supplementary_figure_s19_suppsf19.pdf]

# Supplementary Figure S19. TRADITIOM LSC awakening dynamics

**a** TRADITIOM LSC MCF7 cell numbers

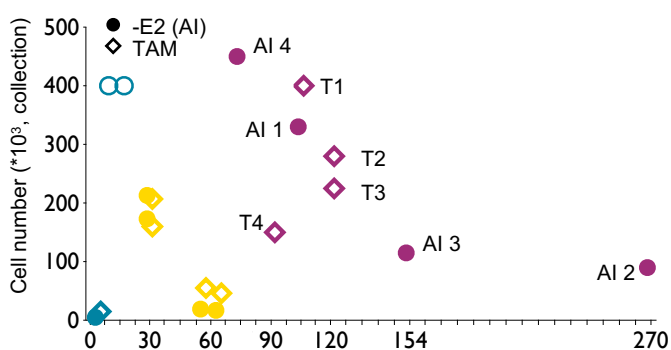

**b** TRADITIOM LSC MCF7 live imaging

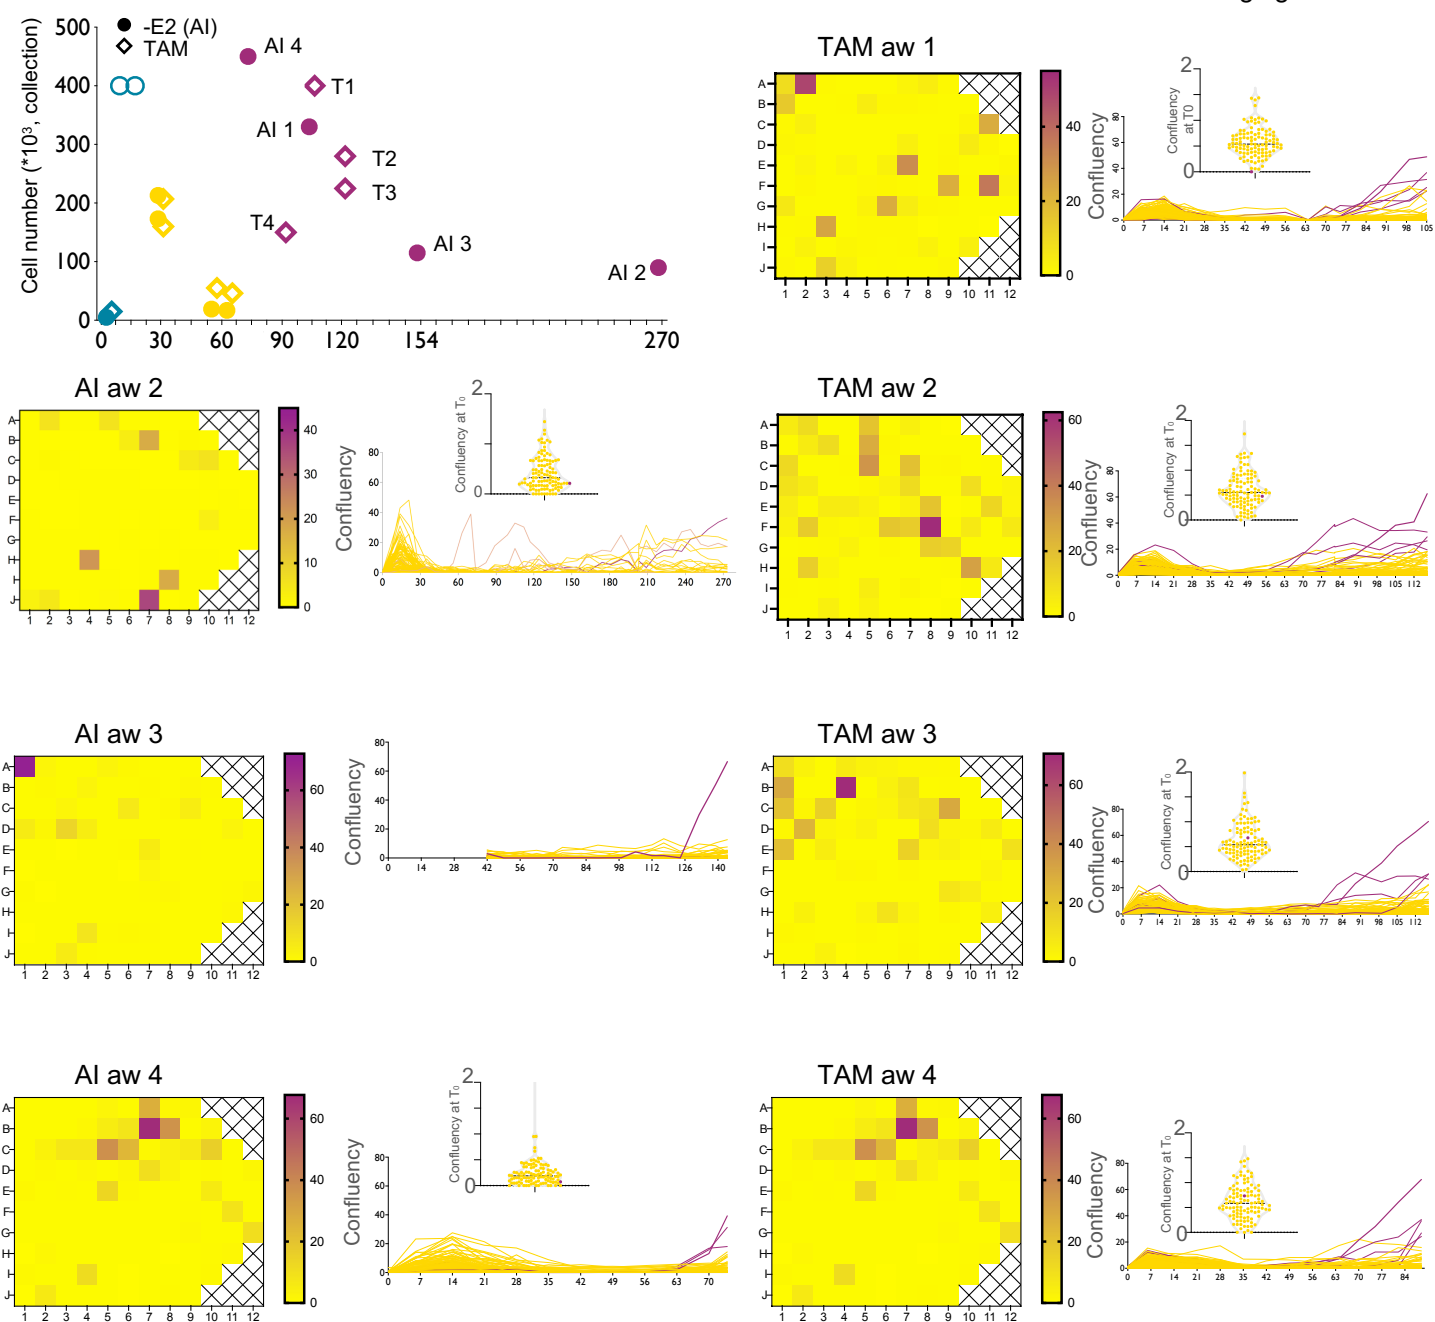

**Supplementary Figure S19. TRADITIOM LSC awakening dynamics.** **a)** Cell counts for TRADITIOM LSC (live single cell) MCF7 flasks for  $-E2$  (AI) (circle) and TAM (diamond) arms at their respective time of collection for scRNA-seq analysis (teal: latency, yellow: dormancy, magenta: awakening). **b)** Proliferation dynamics of TRADITIOM LSC samples TAM aw1-4 (awakening 1-4) and  $-E2$  (AI) aw2-4 (awakening 2-4) determined by weekly Incucyte imaging along with the local confluency heatmap at the time of collection (awakening). Magenta lines follow the growth dynamics of main awakening areas from  $T_0$  to overt expansion that represents the collection point for scRNA-seq analysis. Violin plots show the confluency of each scanning area at  $T_0$  (onset of oestrogen deprivation). The  $T_0$  confluency of awakening area is highlighted in purple.
