# Supplementary material for: Long-term Multimodal Recording Reveals Epigenetic Adaptation Routes in Dormant Breast Cancer Cells
Source: PubMed Central journal article supplement (PMC11061610; doi:10.1158/2159-8290.cd-23-1161), 2024-03-26
Supplement: cd-23-1161_supplementary_figure_s22_suppsf22.pdf [file cd-23-1161_supplementary_figure_s22_suppsf22.pdf]

**Supplementary Figure S22. TRADITIOM LSC Cell cycle states**

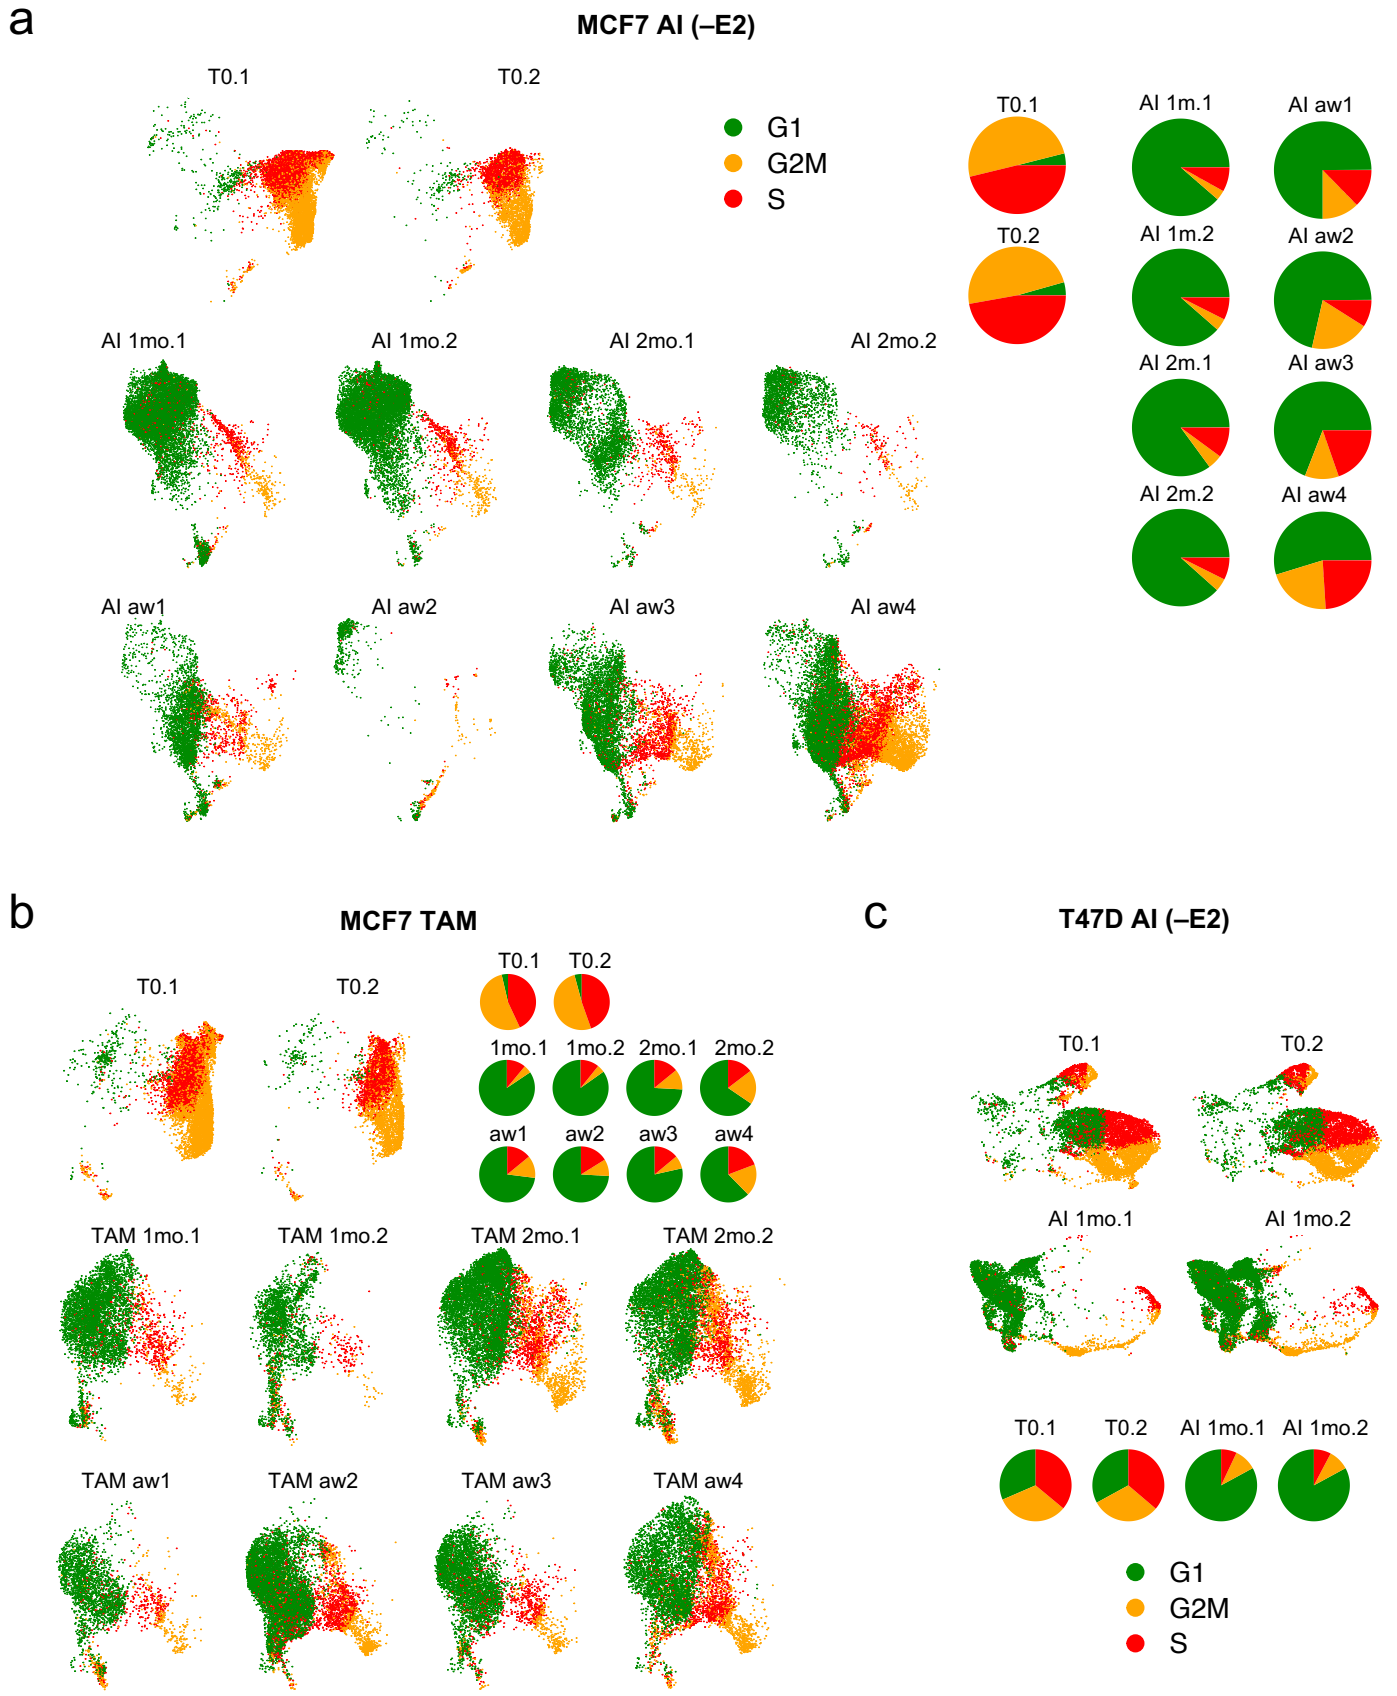

**Supplementary Figure S22. TRADITIOM LSC Cell cycle states.** UMAP projections of TRADITIOM LSC (live single cell) carbon copies (replicates) for MCF7 AI (-E2) arm (a) and TAM arm (b) from T0 to awakening and T47D AI (-E2) (c) from T0 to dormancy (1 month, 1mo) depicting cell cycle states (G1: green, S: red and G2M: orange).
