# Supplementary material for: Long-term Multimodal Recording Reveals Epigenetic Adaptation Routes in Dormant Breast Cancer Cells
Source: PubMed Central journal article supplement (PMC11061610; doi:10.1158/2159-8290.cd-23-1161), 2024-03-26
Supplement: cd-23-1161_supplementary_figure_s23_suppsf23.pdf [file cd-23-1161_supplementary_figure_s23_suppsf23.pdf]

# Supplementary Figure S23. High frequency barcode occupancy of scRNA-seq clusters

## a MCF7 -E2 (AI)

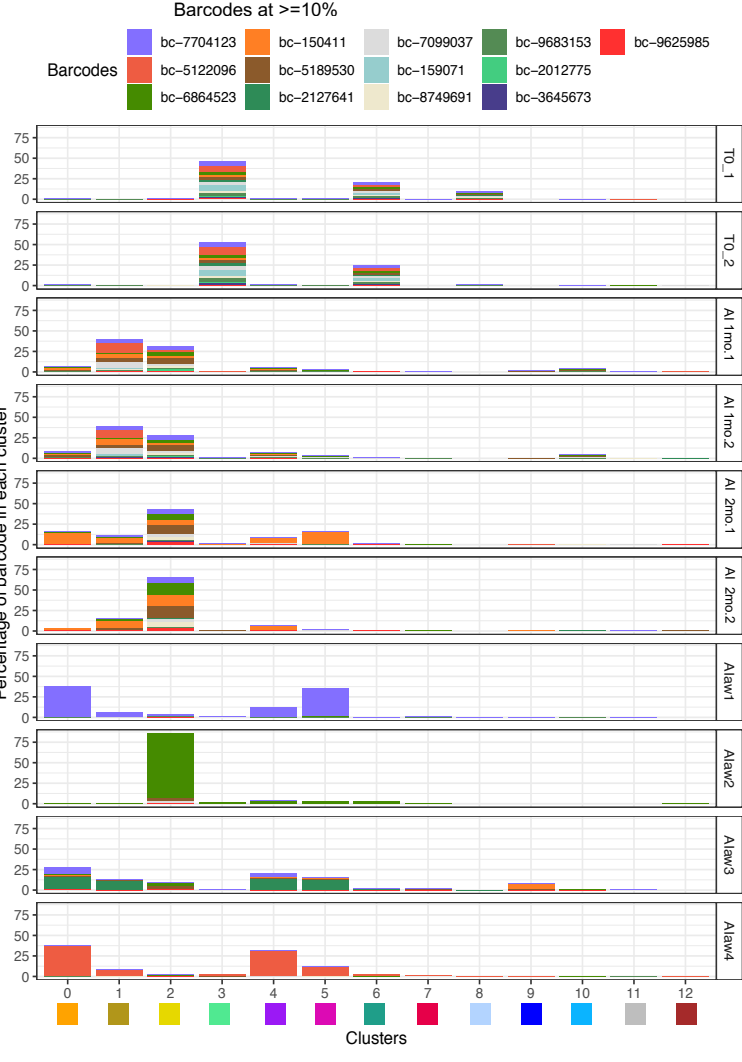

## b MCF7 TAM

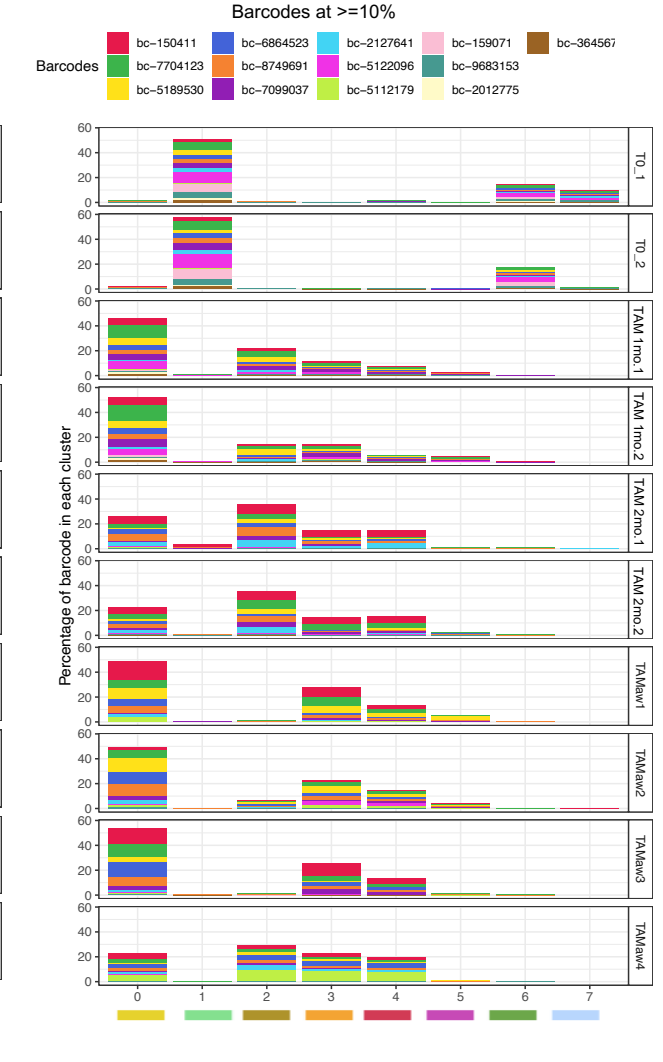

## c T47D -E2 (AI)

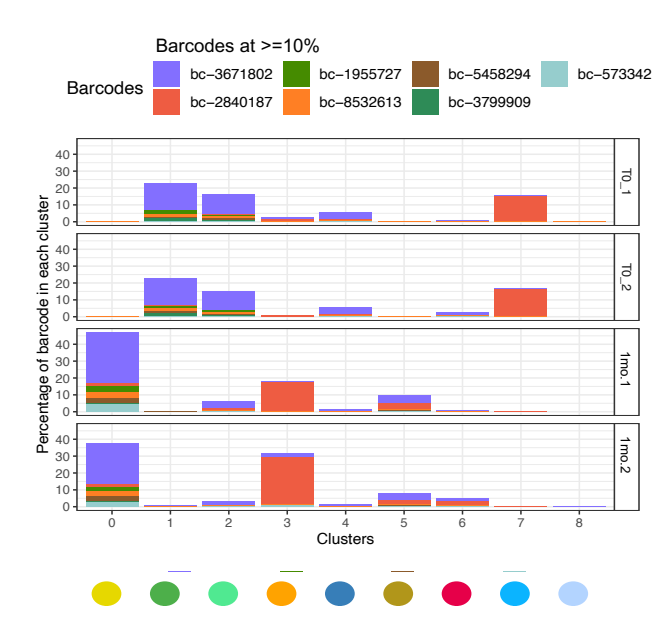

**Supplementary Figure S23. High frequency barcode occupancy of scRNA-seq clusters.** Bar plots depict the percentage of each lineage (barcode frequency >10%) in distinct UMAP clusters for TRADITIOM LSC (live single cell) MCF7 -E2 (AI) (a), MCF7 TAM (b) from T0, early dormancy (1month, 1mo), late dormancy (2month, 2mo) to awakening and T47D -E2 (AI) (c) from T0 to dormancy (1month, 1mo).
