# Supplementary material for: Long-term Multimodal Recording Reveals Epigenetic Adaptation Routes in Dormant Breast Cancer Cells
Source: PubMed Central journal article supplement (PMC11061610; doi:10.1158/2159-8290.cd-23-1161), 2024-03-26
Supplement: cd-23-1161_supplementary_figure_s25_suppsf25.pdf [file cd-23-1161_supplementary_figure_s25_suppsf25.pdf]

# Supplementary Figure S25. Failed Awakening characterization

**a** TRADITIOM Live: awakening topography (12 cc)

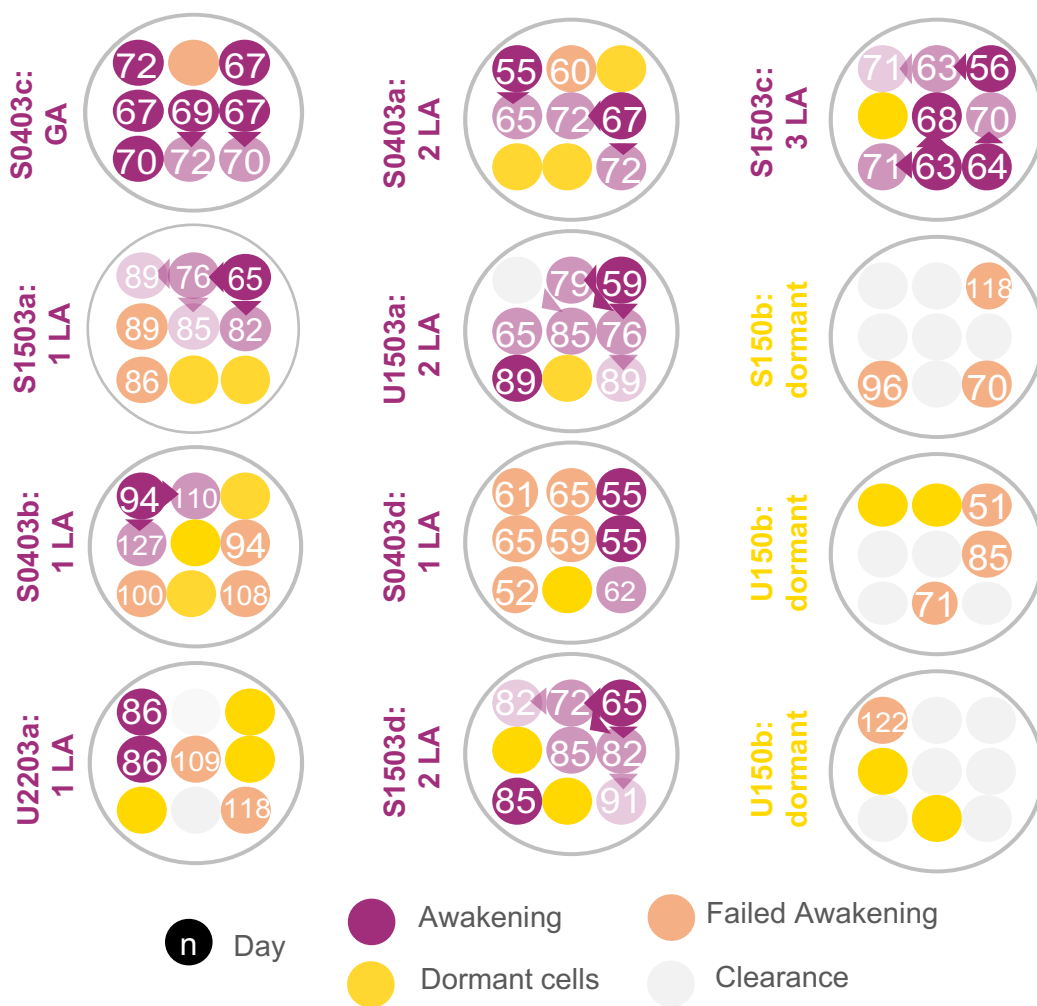

**b** UMAP projections of cycling and non-cycling winner barcodes vs others

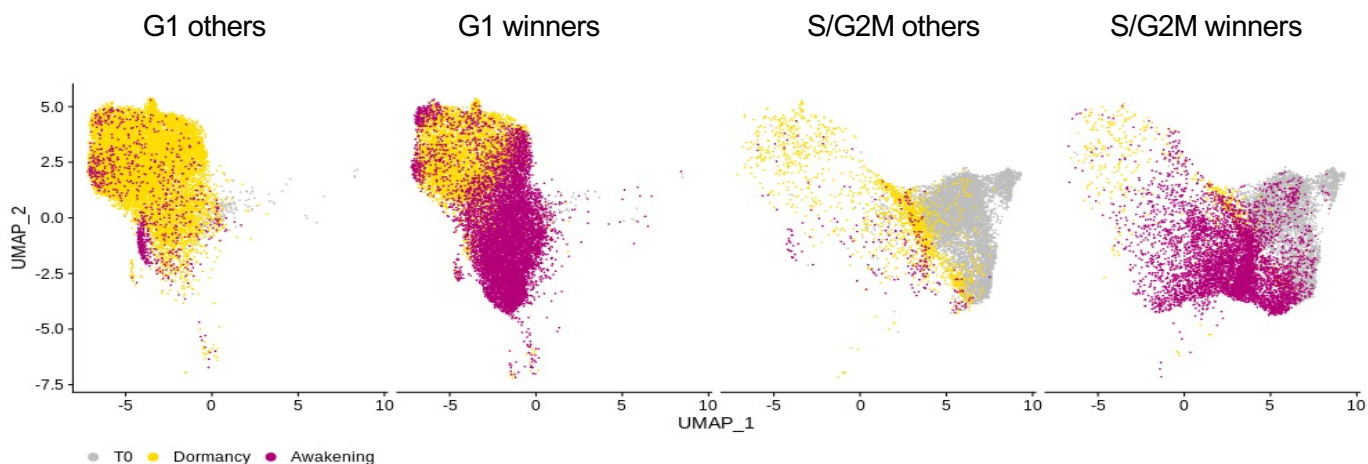

**Supplementary Figure S25. Failed awakening characterization. a)** TRADITIOM-Live awakening topography, detailed analysis. Cells were seeded in 48-well format, exposed to oestrogen deprivation (-E2) and imaged (9 scanning windows *per* well) to monitor awakening dynamics (awakening=wells reaching a confluency of 50%). GA: global awakening, LA: localized awakening. Arrows indicate the expansion of a growing colony in the adjacent scanning window. **b)** UMAP projections of cycling (S/G2M) and non-cycling (G1) winner vs non-winner lineages (others) at dormancy (yellow) and awakening (magenta).
