# Supplementary material for: Long-term Multimodal Recording Reveals Epigenetic Adaptation Routes in Dormant Breast Cancer Cells
Source: PubMed Central journal article supplement (PMC11061610; doi:10.1158/2159-8290.cd-23-1161), 2024-03-26
Supplement: cd-23-1161_supplementary_figure_s27_suppsf27.pdf [file cd-23-1161_supplementary_figure_s27_suppsf27.pdf]

# Supplementary Figure S27. Stratification of BC patients using the epigenetic dormancy signature

a

| Genes included in the epigenetic dormant signature |
|----------------------------------------------------|
| EZH2                                               |
| EHMT2 (G9A)                                        |
| KMT5C (SUV420H2)                                   |

b

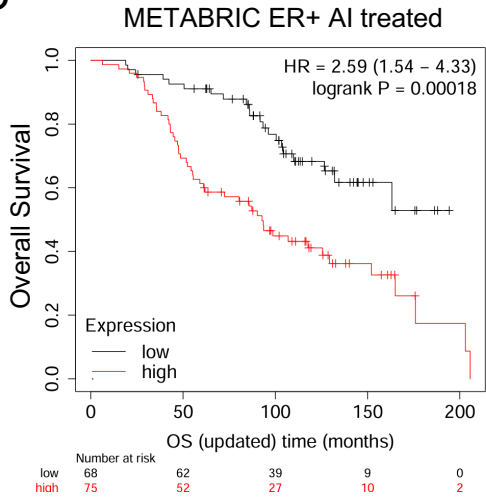

c

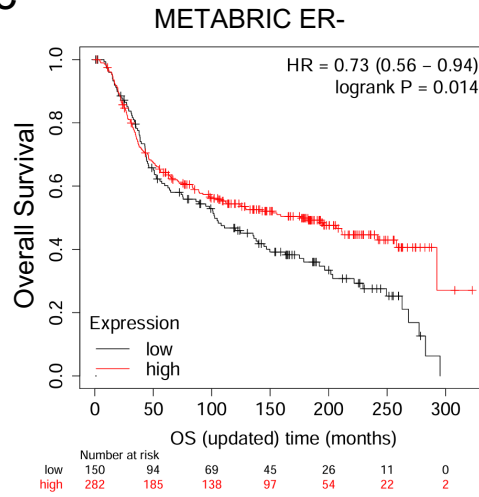

d

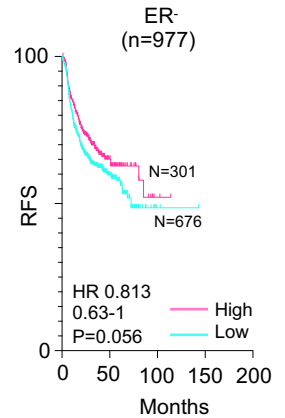

**Supplementary Figure S27. Stratification of BC patients using the epigenetic dormancy signature. a)** Genes included in the epigenetic dormancy signature **b)** Overall Survival (OS) curves for ER-positive (ER+) patients stratified based on the expression of the epigenetic dormancy signature (high vs low *G9a/EZH2/KMT5C* expression) **c)** Overall Survival (OS) curves for ER-negative (ER-) patients treated with Aromatase Inhibitors (AI) stratified based on the expression of the epigenetic dormancy signature **d)** Relapse free survival (RFS) curves for ER-negative (ER-) patients stratified based on the expression of the epigenetic dormancy signature.
